# Supplementary material
Source: publisher figshare collection journal article supplement (https://acs.figshare.com/ndownloader/files/27363906)
Supplement: Supplementary file 1 [file 27363906]

## Supporting Information

### Efficient Photoinduced Energy and Electron Transfers in a Tetraphenylethene-Based Octacationic Cage through Host-Guest Complexation

Honghong Duan,<sup>1</sup> Fan Cao,<sup>1</sup> Hongxing Hao,<sup>2</sup> Hongtao Bian,<sup>2</sup> and Liping Cao<sup>1,\*</sup>

<sup>1</sup>College of Chemistry and Materials Science, Northwest University, Xi'an, 710069, P. R. China.

<sup>2</sup>Key Laboratory of Applied Surface and Colloid Chemistry of Ministry of Education, School of Chemistry and Chemical Engineering, Shaanxi Normal University, Xi'an 710062, P. R. China.

\*e-mail: chcaoliping@nwu.edu.cn

| Table of Contents                             | Pages |
|-----------------------------------------------|-------|
| Experimental procedures                       | S2    |
| Host-guest chemistry between cage and dyes    | S3    |
| UV-vis and fluorescence experiments           | S13   |
| Cyclic voltammetry                            | S23   |
| Femtosecond transient absorption spectroscopy | S26   |

## Experimental Procedures

### General Experimental Details.

Starting materials were purchased from commercial suppliers were used without further purification. NMR spectra were recorded on a spectrometer operating at 400 MHz for  $^1\text{H}$  NMR spectra on a Bruker ascend spectrometer. UV/vis spectra were done on Agilent Cary-100 spectrometer. Fluorescence spectra were performed by using a Horiba Fluorolog-3 spectrometer and the absolute photoluminescence quantum efficiency were acquired by using an integrating sphere. Fluorescence decay profiles were recorded on a Flsp920. The CV measurement was conducted in dimethylsulfoxide (DMSO) with 0.1 M tetrabutylammonium hexafluorophosphate as the supporting electrolyte at a scan rate of  $50\text{ mV s}^{-1}$ , using platinum as the working electrode, saturated calomel electrode (SCE) as the reference electrode, and platinum wire counter electrode. The SCE reference electrode was calibrated using the ferrocene/ferrocenium ( $\text{Fc}/\text{Fc}^+$ ) redox couple as an external standard. The fsTA measurements were performed based on a femtosecond Ti:Sapphire regenerative amplified Ti:sapphire laser system (Spectra Physics, Spitfire-Pro) and an automated data acquisition system (Ultrafast Systems, Helios model).

### Materials.

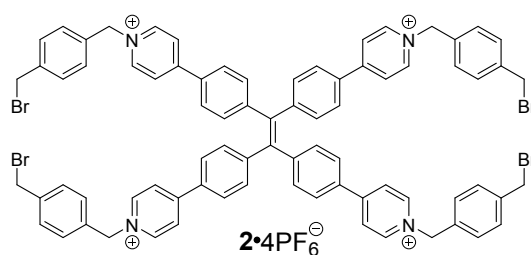

Nile Red (**NiR**), Rhodamine 700 (**R700**), Rhodamine 800 (**R800**), Indocyanine Green (**ICG**), Acid Green 25 (**AG**), Acid Violet 43 (**AV**), and other materials/solvents were purchased and used as received. **1•8PF<sub>6</sub><sup>−</sup>**, **1•8Cl<sup>−</sup>**, and **2•4PF<sub>6</sub><sup>−</sup>** were synthesized by previously reported procedures.<sup>1</sup>

## NMR experiment

$^1\text{H}$  NMR spectra were recorded on a Bruker ascend spectrometer. Chemical Shifts are recorded in ppm ( $\delta$ ) in  $\text{D}_2\text{O}$  (internal reference set to  $\delta$  4.79),  $\text{CD}_3\text{CN}$  (internal reference set to  $\delta$  2.13). Titrations were performed by using stock solutions of host and guest to make up samples of desired concentrations and equivalents. All spectra were recorded at 298 K.

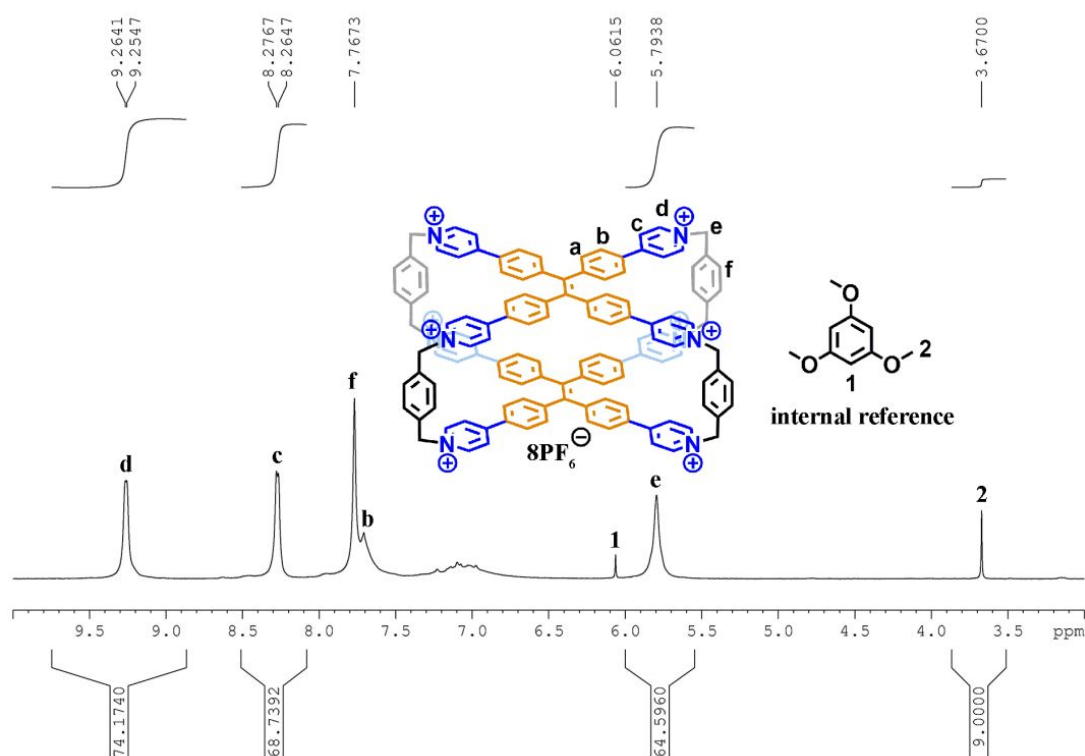

**Figure S1.**  $^1\text{H}$  NMR (400 MHz,  $\text{DMSO}-d_6$ ) of **1** (20  $\mu\text{L}$  saturated solution of **1** in  $\text{CD}_3\text{CN}$  was dried in high vacuum) with 20  $\mu\text{L}$  of 1,3,5-trimethoxy-benzen (20.0 mM) as internal reference. The solubility of **1** was calculated as 86.4 mM based on the average integral from three proton resonances ( $\text{H}_\text{d}$ ,  $\text{H}_\text{c}$ , and  $\text{H}_\text{e}$ ).

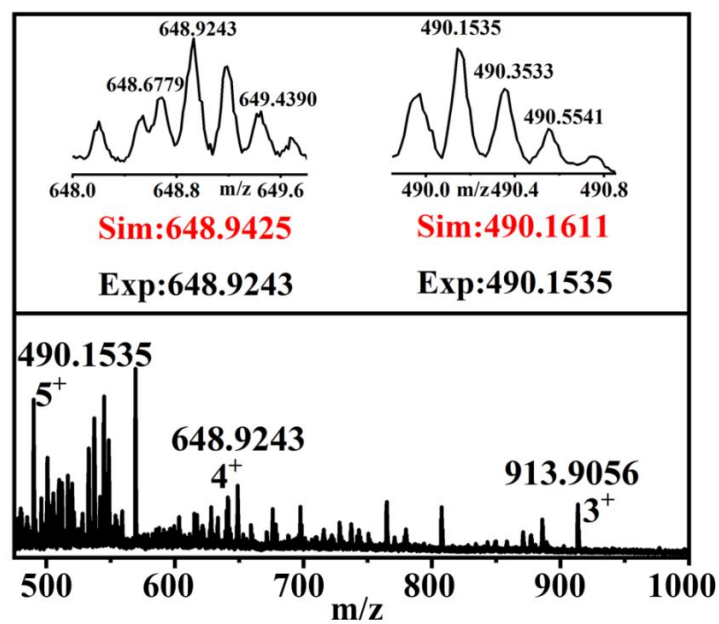

**Figure S2.** Experimental and calculated electrospray ionization mass spectra of **1•8PF<sub>6</sub><sup>-</sup>**  
 □NiR.

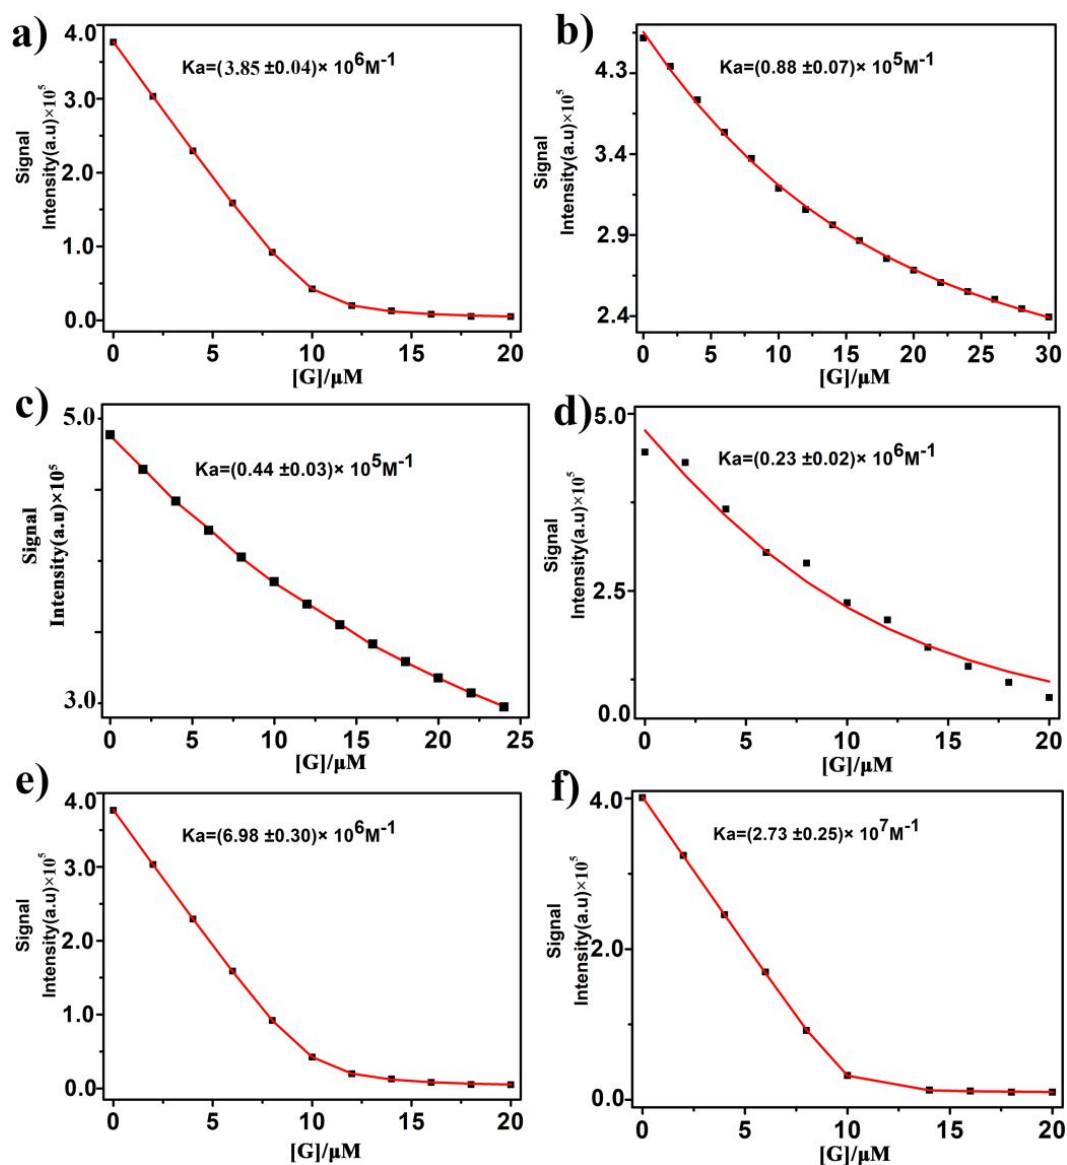

**Figure S3.** The calculation of the host-guest binding constant was fitted with dynifit by the data of fluorescence titration. a) **1**• $\text{PF}_6^-$  and **NiR** in  $\text{CH}_3\text{CN}$ ; b) **1**• $\text{Cl}^-$  and **R700**; c) **1**• $\text{Cl}^-$  and **R800**; d) **1**• $\text{Cl}^-$  and **ICG**; e) **1**• $\text{Cl}^-$  and **AG**; f) **1**• $\text{Cl}^-$  and **AV** in  $\text{H}_2\text{O}$ .

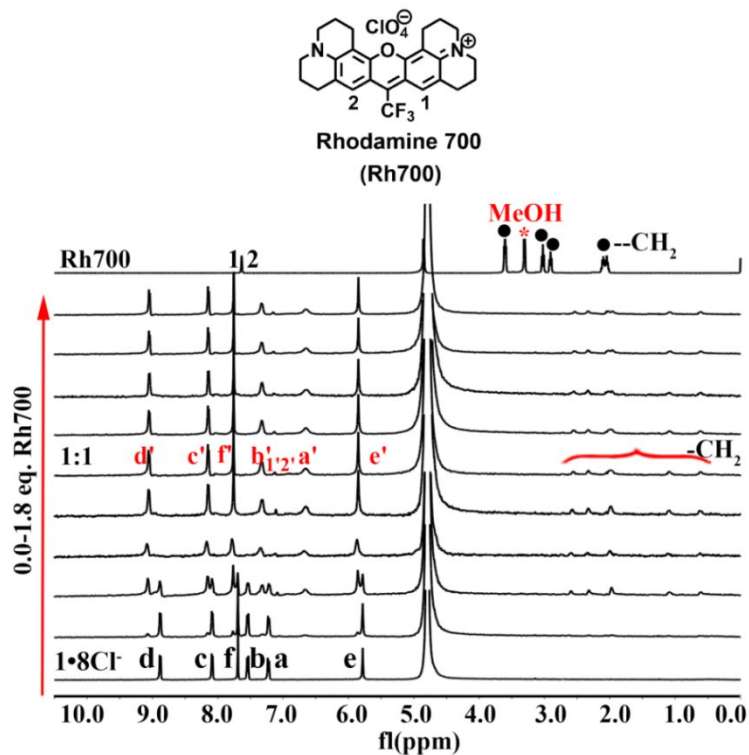

**Figure S4.**  $^1\text{H}$  NMR titration (400 MHz,  $\text{D}_2\text{O}$ , RT)  $\mathbf{1}\cdot\mathbf{8Cl}^-$  (0.40 mM) titrated with **R700** (0–2.0 equiv).

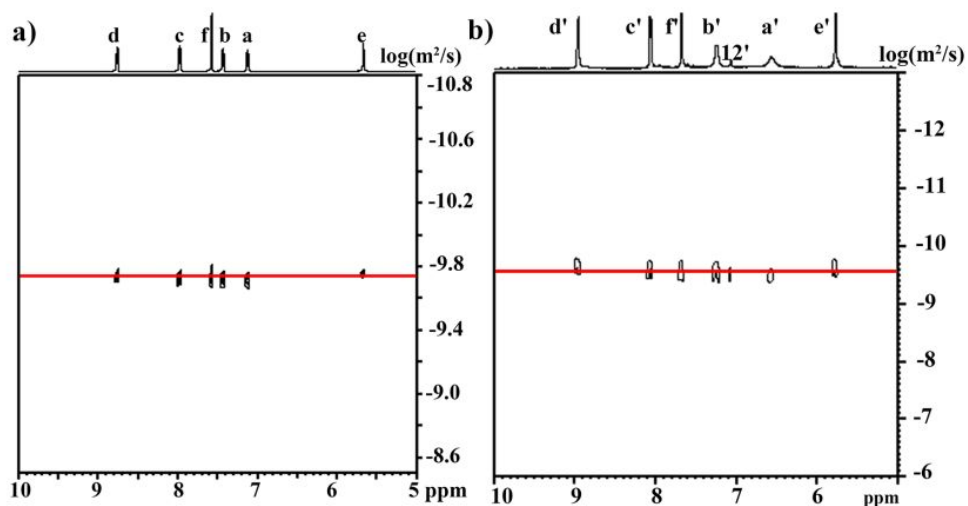

**Figure S5.** DOSY spectra recorded (400 MHz,  $\text{D}_2\text{O}$ , RT) for (a)  $\mathbf{1}\cdot\mathbf{8Cl}^-$  and (b)  $\mathbf{1}\cdot\mathbf{8Cl}^-$   $\square$  **R700**.

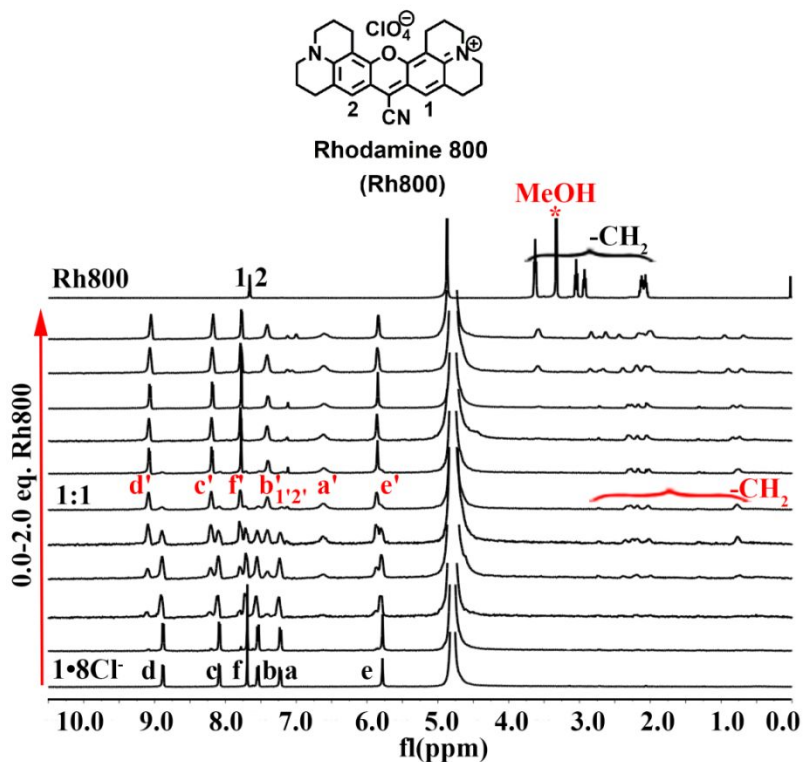

**Figure S6.**  $^1\text{H}$  NMR titration (400 MHz,  $\text{D}_2\text{O}$ , RT)  $\mathbf{1}\cdot\mathbf{8Cl}^-$  (0.40 mM) titrated with **R800** (0–2.0 equiv).

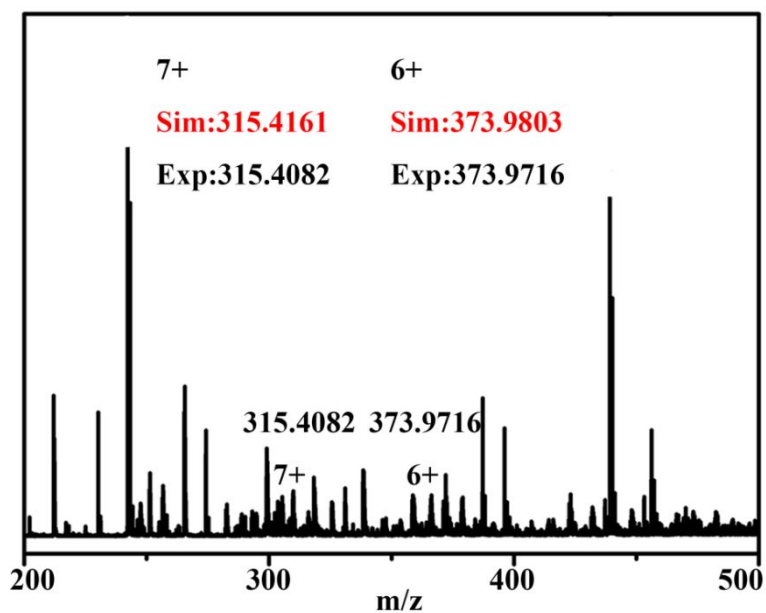

**Figure S7.** Experimental and calculated electrospray ionization mass spectra of  $\mathbf{1}\cdot\mathbf{8Cl}^-$   $\square$  **R700**.

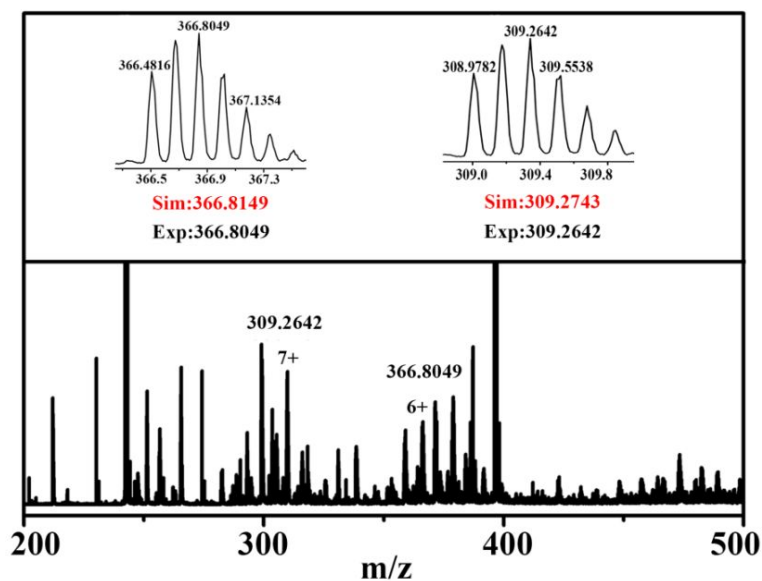

**Figure S8.** Experimental and calculated electrospray ionization mass spectra of **1•8Cl<sup>-</sup>** **R800**.

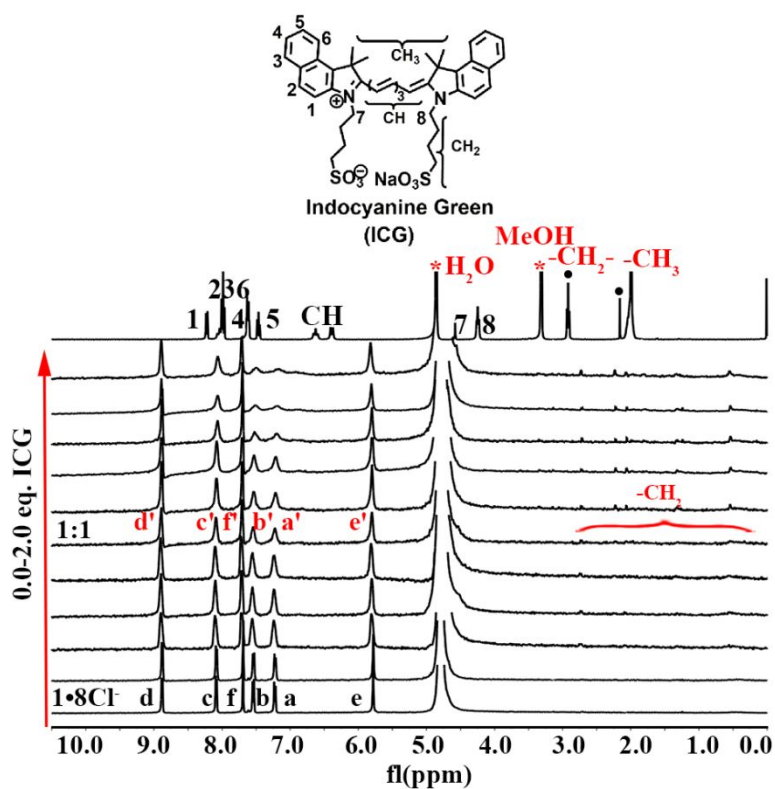

**Figure S9.** <sup>1</sup>H NMR titration (400 MHz, D<sub>2</sub>O, RT) **1•8Cl<sup>-</sup>** (0.40 mM) titrated with **ICG** (0–2.0 equiv).



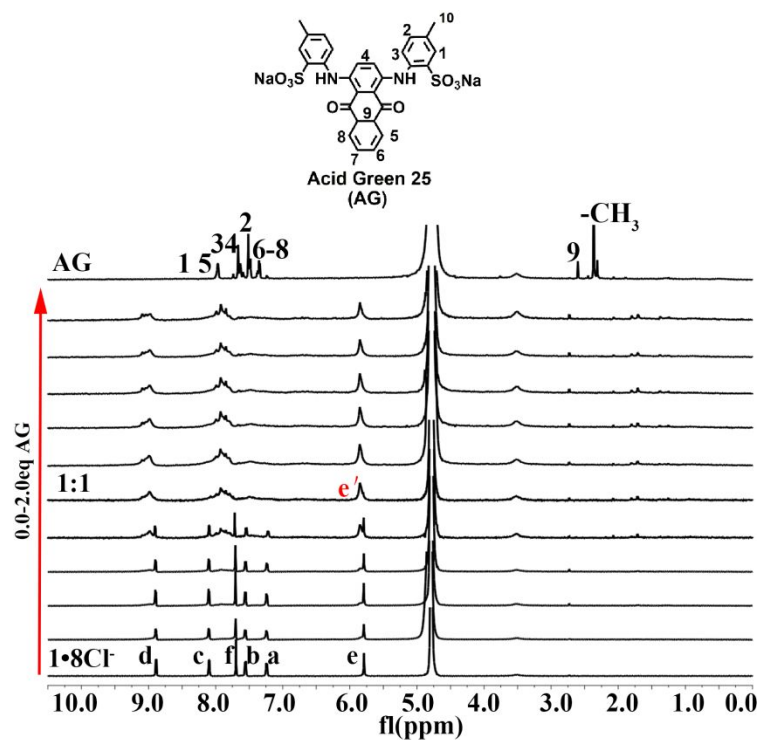

**Figure S10.**  $^1\text{H}$  NMR titration (400 MHz,  $\text{D}_2\text{O}$ , RT)  $1\cdot 8\text{Cl}^-$  (0.40 mM) titrated with AG (0–2.0 equiv).

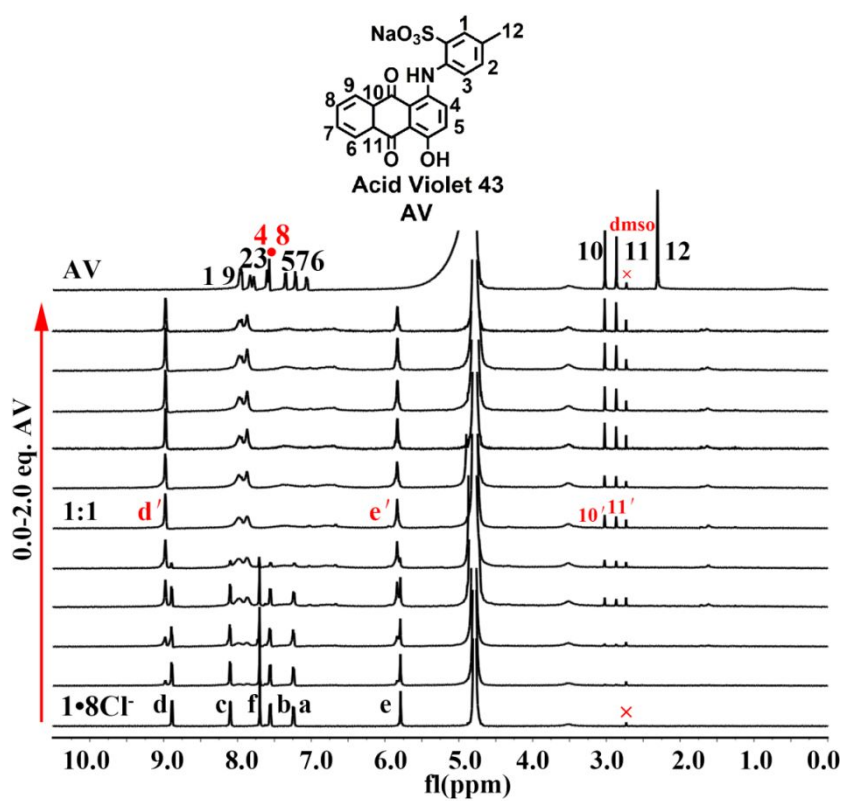

**Figure S11.**  $^1\text{H}$  NMR titration (400 MHz,  $\text{D}_2\text{O}$ , RT)  $1\cdot 8\text{Cl}^-$  (0.4 mM) titrated with AV (0–2.0 equiv.).

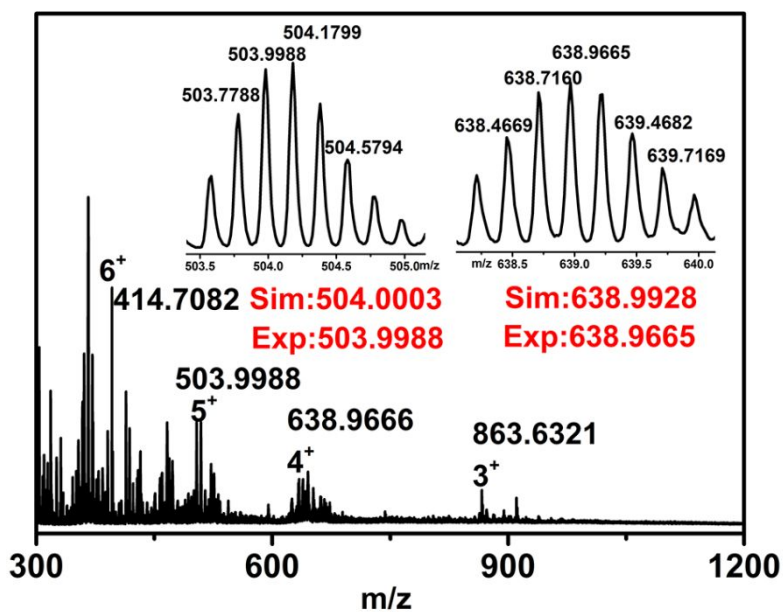

**Figure S12.** Experimental and calculated electrospray ionization mass spectra of **1•8Cl<sup>-</sup>** ICG.

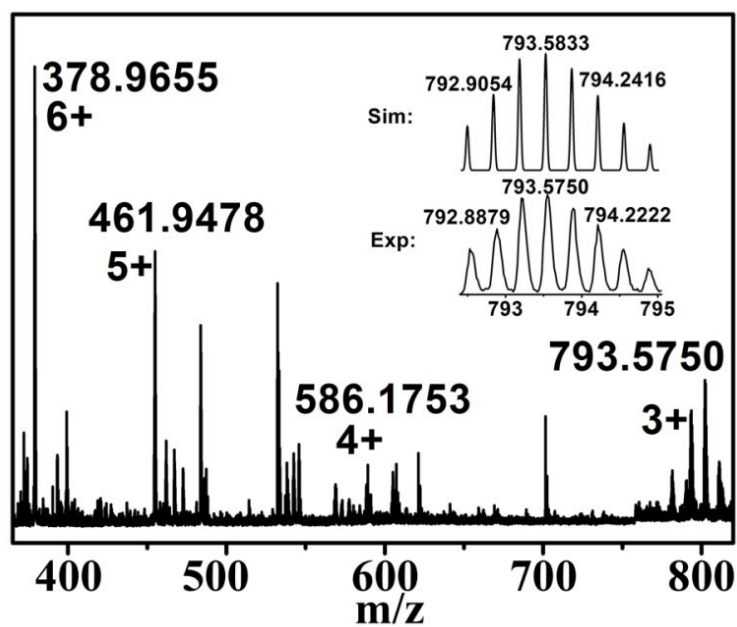

**Figure S13.** Experimental and calculated electrospray ionization mass spectra of **1•8Cl<sup>-</sup>** AG.

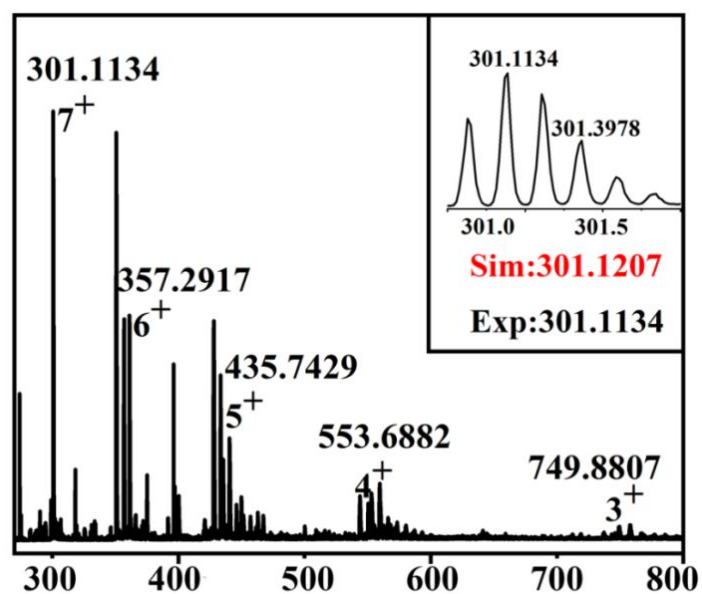

**Figure S14.** Experimental and calculated electrospray ionization mass spectra of **1•8Cl<sup>-</sup>**  
 □AV.

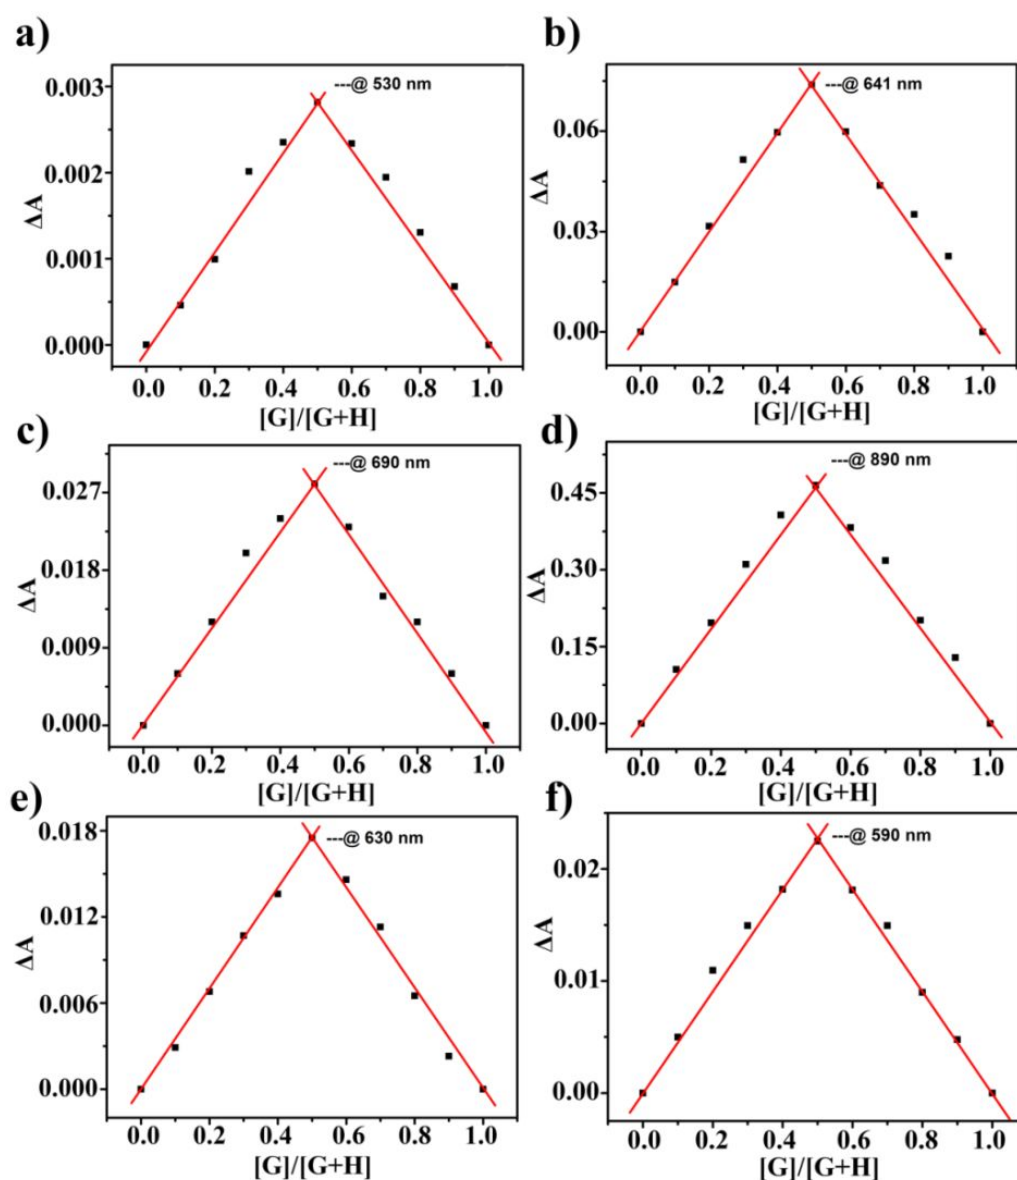

**Figure S15.** Job plot for the host-guest complexes between cage and dyes guest at room temperature, showing a 1:1 binding in solution: a)  $1\bullet 8PF_6^-$  and **NiR** in  $CH_3CN$ ; b)  $1\bullet 8Cl^-$  and **R700**; c)  $1\bullet 8Cl^-$  and **R800**; d)  $1\bullet 8Cl^-$  and **ICG**; e)  $1\bullet 8Cl^-$  and **AG**; f)  $1\bullet 8Cl^-$  and **AV** in  $H_2O$ .

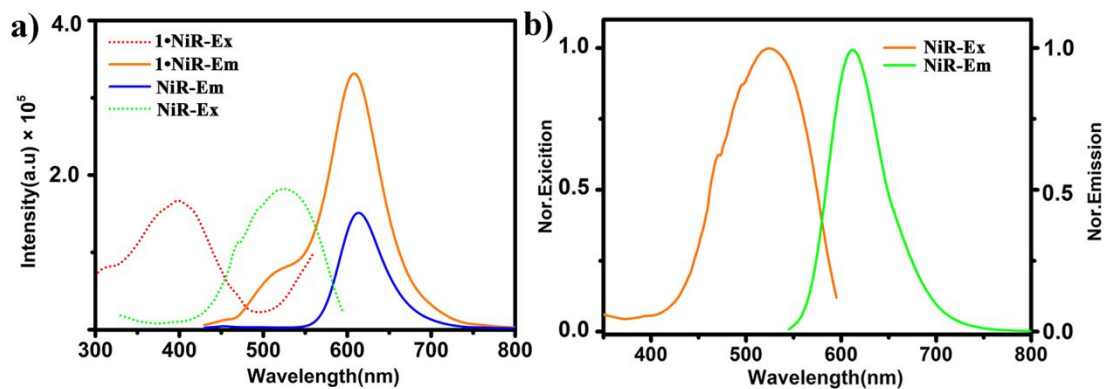

**Figure S16.** (a) Excitation and emission spectra of **NiR** and **1•8PF<sub>6</sub><sup>−</sup>□NiR** in CH<sub>3</sub>CN. Ex/Em slit = 1.6 nm,  $\lambda_{\text{ex}}$  = 410 nm. (b) Normalized fluorescence excitation and emission spectra of **NiR**.

**Table S1.** Fluorescence quantum yield and Fluorescence lifetime of dyes

| Compound    | Fluorescence       | Fluorescence                 |
|-------------|--------------------|------------------------------|
|             | quantum yield      | lifetime                     |
|             | $\Phi_F$ (%)       | $\tau_F$ (ns) <sup>c,d</sup> |
| <b>NiR</b>  | 41.16 <sup>a</sup> | 4.86                         |
| <b>R700</b> | 0.20 <sup>b</sup>  | 5.70                         |
| <b>R800</b> | 0.79 <sup>b</sup>  | 5.76                         |
| <b>ICG</b>  | 0.1 <sup>b</sup>   | —                            |
| <b>AG</b>   | 0.55 <sup>b</sup>  | —                            |
| <b>AV</b>   | 0.1 <sup>b</sup>   | —                            |

<sup>a</sup>Determined in CH<sub>3</sub>CN (10  $\mu$ M); <sup>b</sup>Determined in water (10  $\mu$ M); <sup>c</sup>Average lifetimes  $\tau = \{(A_1\tau_1 + A_2\tau_2)/100\}$ ; <sup>d</sup>Decay at 545 nm; <sup>f</sup>Decay at 610 nm (**NiR**), 680 nm (**R700**), 715 nm (**R800**), respectively.

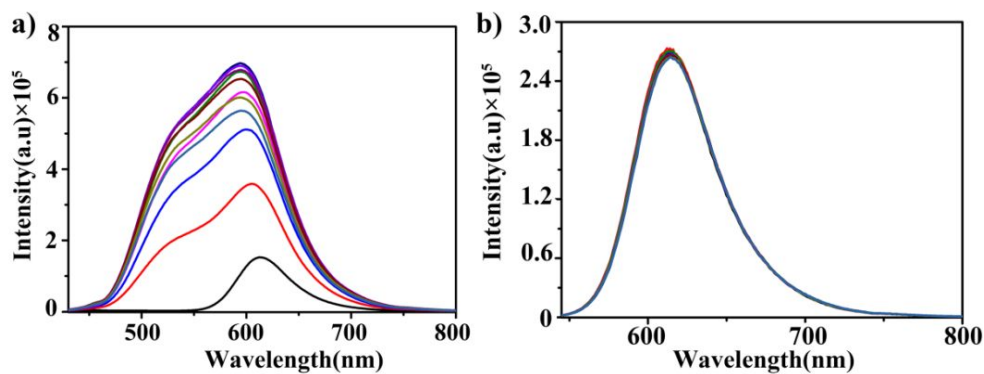

**Figure S17.** Fluorescence spectra of **NiR** (10 μM) titrated with **1•8PF<sub>6</sub><sup>-</sup>** (0–2.0 equiv) in CH<sub>3</sub>CN: (a) λ<sub>ex</sub> = 410 nm, (b) λ<sub>ex</sub> = 525 nm. Ex/Em slit = 1.6 nm.

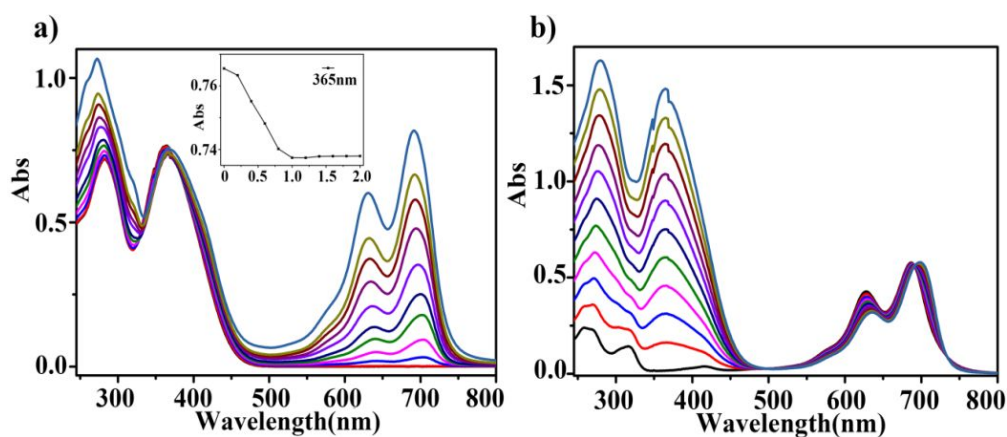

**Figure S18.** (a) UV/vis spectra of **1•8Cl<sup>-</sup>** (10 μM) titrated with **R800** (0–3.0 equiv) in H<sub>2</sub>O. (b) UV/vis spectra of **R800** (10 μM) titrated with **1•8Cl<sup>-</sup>** (0–2.0 equiv) in H<sub>2</sub>O.

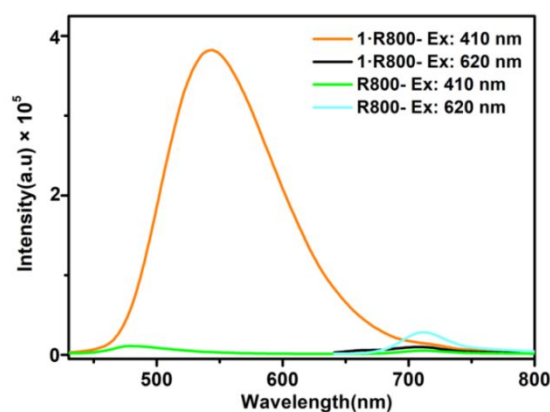

**Figure S19.** Fluorescence spectra of fluorescence spectra of **1•8Cl<sup>-</sup> □ R800** (10 μM) and **R800** (10 μM) upon different excitation. Ex/Em slit = 1.6 nm, λ<sub>ex</sub> = 410/620 nm.

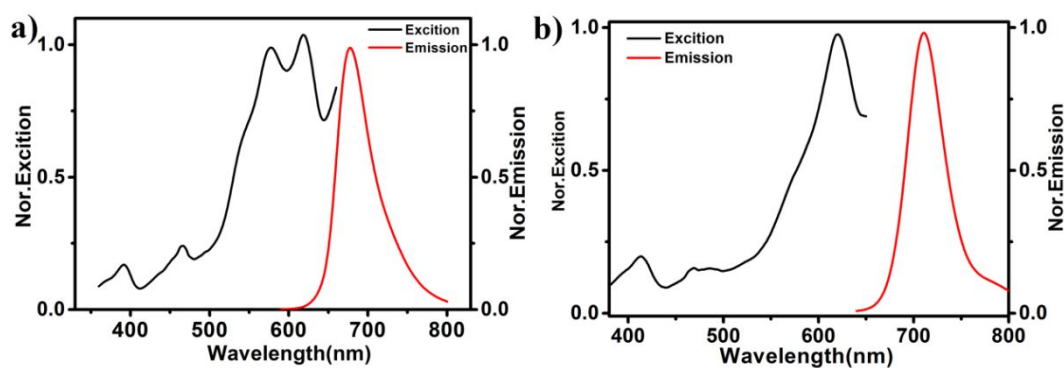

**Figure S20.** Normalized fluorescence excitation (black) and emission (red) spectra of (a) **R700** and (b) **R800** in H<sub>2</sub>O. Ex/Em slit = 1.5 nm, [**R700**] = [**R800**] =  $1.0 \times 10^{-5}$  M.

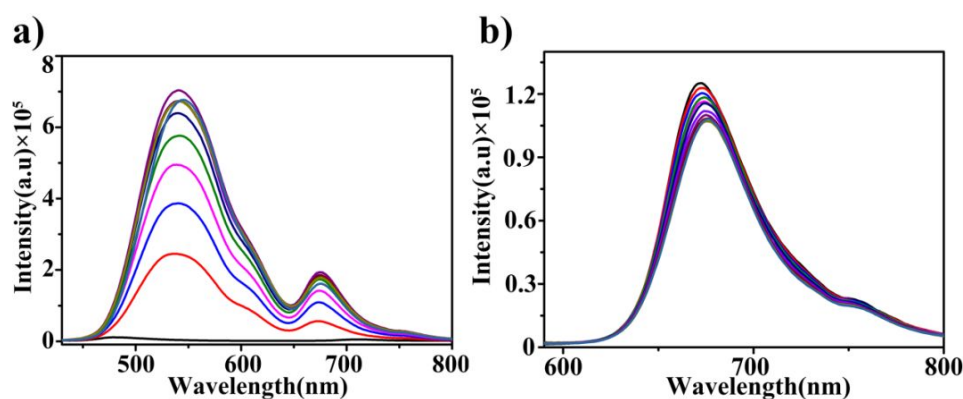

**Figure S21.** Fluorescence spectra of **R700** (10  $\mu$ M) titrated with **1•8Cl<sup>-</sup>** (0–2.0 equiv) in H<sub>2</sub>O. Ex/Em slit = 1.6 nm, (a)  $\lambda_{\text{ex}} = 410$  nm, (b)  $\lambda_{\text{ex}} = 570$  nm.

### Energy-transfer efficiency ( $\Phi_{\text{ET}}$ )

Energy-transfer efficiency ( $\Phi_{\text{ET}}$ ), the fraction of the absorbed energy that is transferred to the acceptor is experimentally measured as a ratio of the fluorescence intensities of the donor in the absence and presence of the acceptor ( $I_{\text{D}}$  and  $I_{\text{DA}}$ ).<sup>[1]</sup>

$$\Phi_{\text{ET}} = 1 - I_{\text{DA}}/I_{\text{D}}$$

The energy-transfer efficiency ( $\Phi_{\text{ET}}$ ) of **1•8PF<sub>6</sub><sup>-</sup>** + 2.0 eq. **NiR** ([**1**] = 10  $\mu$ M) was calculated as 98% at 545 nm in CH<sub>3</sub>CN,  $\lambda_{\text{ex}} = 410$  nm, Ex/Em slit = 1.2 nm. The energy-transfer efficiency ( $\Phi_{\text{ET}}$ ) of **1•8Cl<sup>-</sup>** + 2.0 eq. **R700** ([**1**] = 10  $\mu$ M) was calculated as 79% at 545 nm in H<sub>2</sub>O,  $\lambda_{\text{ex}} = 410$  nm, Ex/Em slit = 1.2 nm. The energy-transfer efficiency ( $\Phi_{\text{ET}}$ ) of **1•8Cl<sup>-</sup>** + 2.0 eq. **R800** ([**1**] = 10  $\mu$ M) was calculated as 46.7% at 545 nm in H<sub>2</sub>O,  $\lambda_{\text{ex}} = 410$  nm, Ex/Em slit = 1.2 nm.



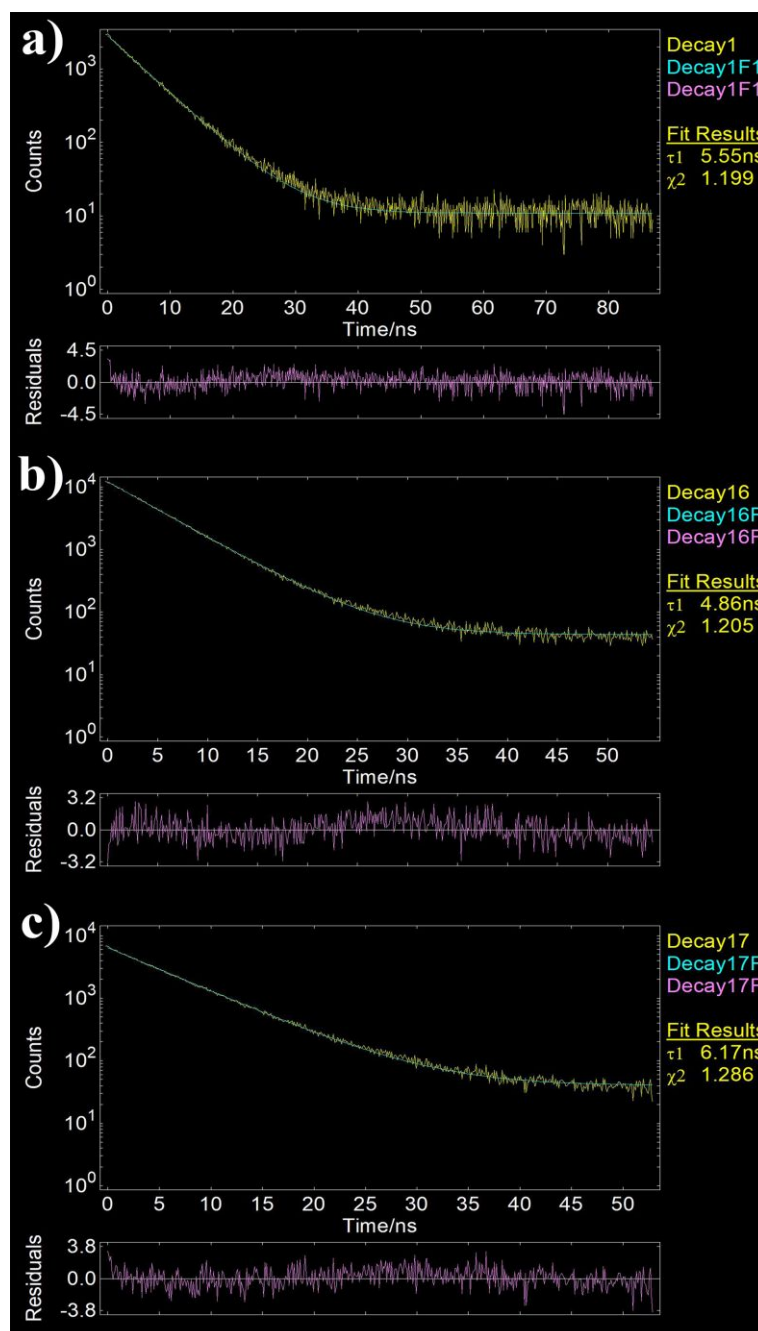

**Figure S22.** Fluorescence decay profiles of (a) 1•8PF<sub>6</sub><sup>-</sup>, (b) NiR and (c) 1•8PF<sub>6</sub><sup>-</sup> □ NiR in MeCN.



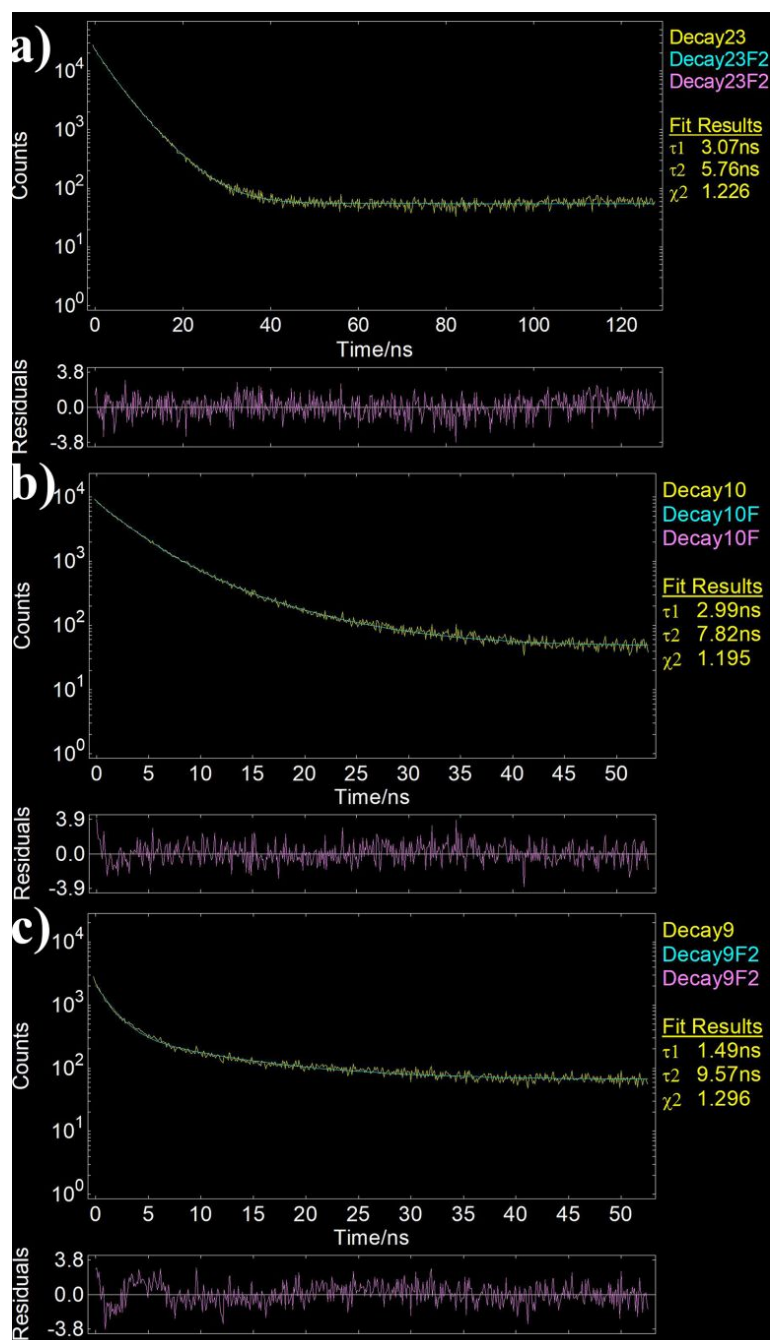

**Figure S23.** Fluorescence decay profiles of (a)  $1\bullet 8Cl^-$ , (b) **R700** and (c)  $1\bullet 8Cl^- + R700$  in  $H_2O$ .

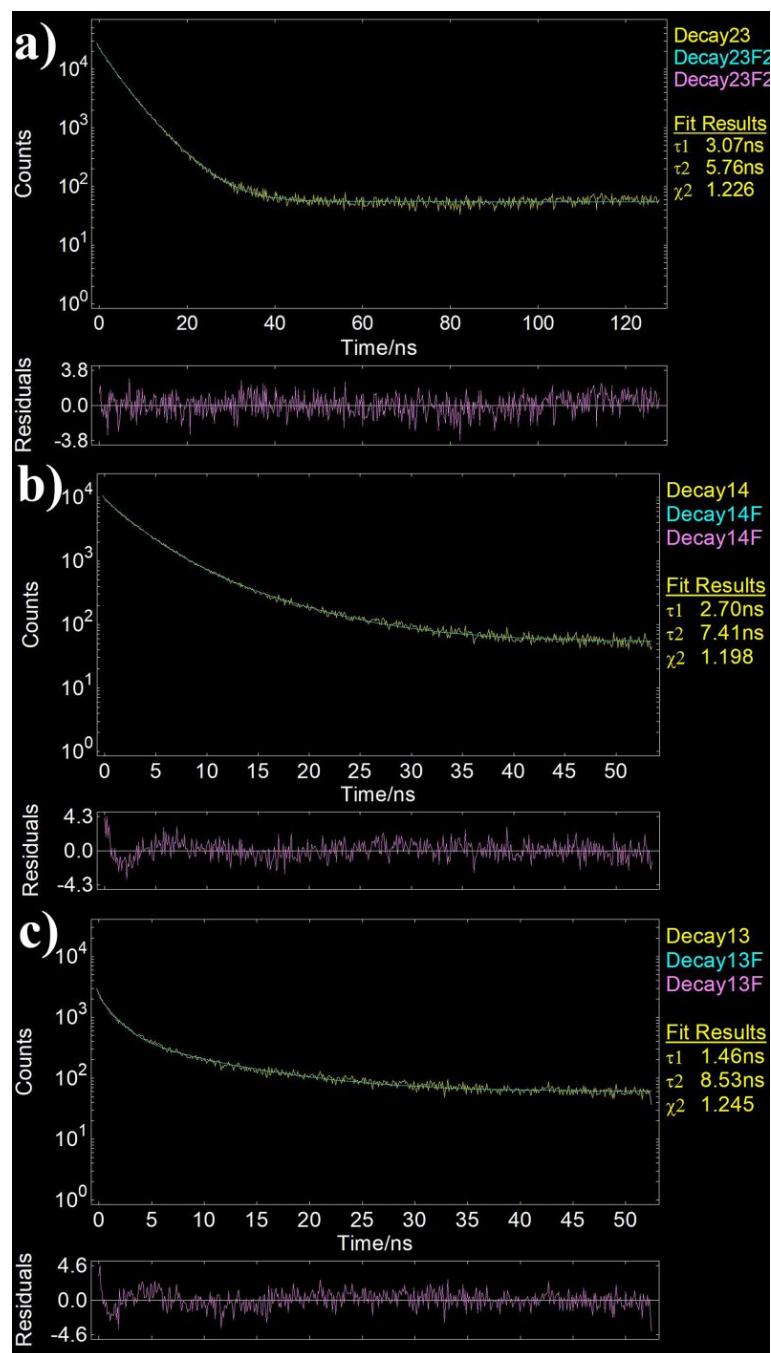

**Figure S24.** Fluorescence decay profiles of (a) 1•8Cl<sup>-</sup>, (b) R800 and (c) 1•8Cl<sup>-</sup> □ R800 in H<sub>2</sub>O.

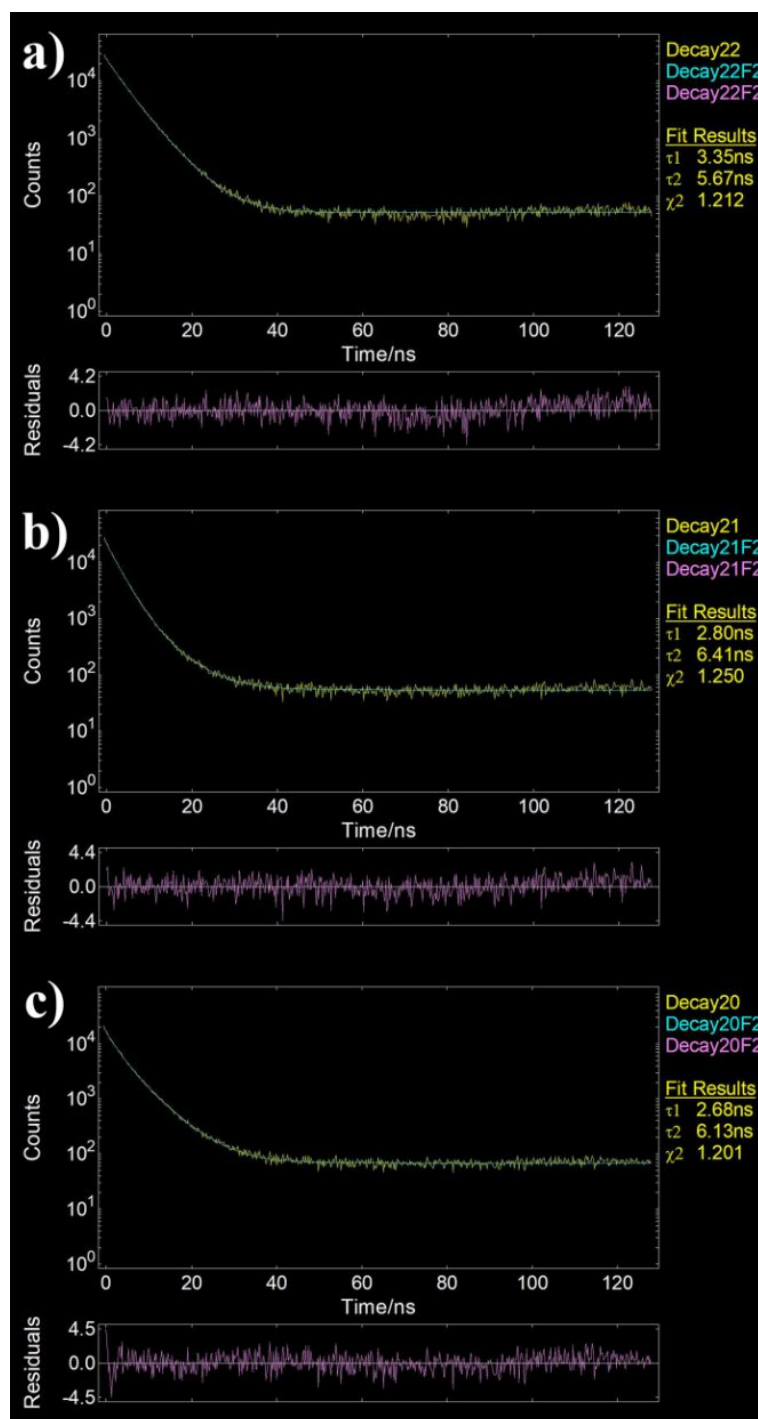

**Figure S25.** Fluorescence decay profiles of (a)  $1\bullet 8\text{Cl-ICG}$ , (b)  $1\bullet 8\text{Cl-AG}$  and (c)  $1\bullet 8\text{Cl-AV}$  in  $\text{H}_2\text{O}$ .

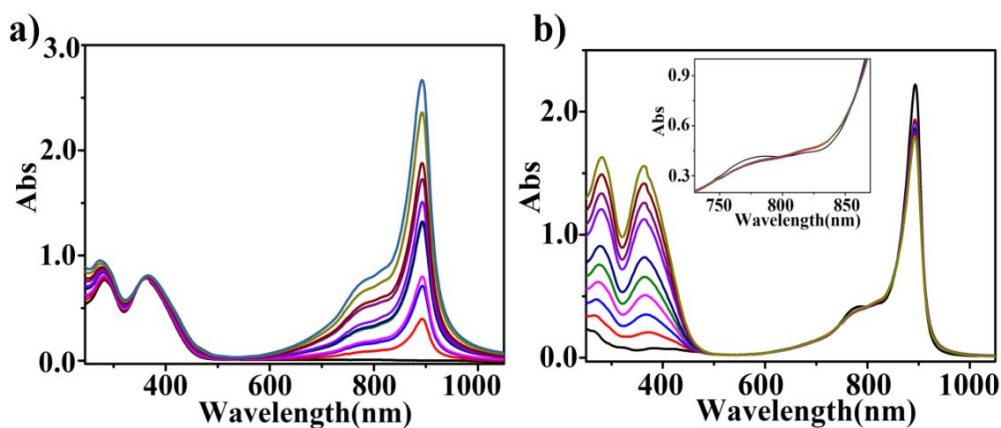

**Figure S26.** (a) UV/vis spectra of  $1\bullet 8\text{Cl}^-$  (10  $\mu\text{M}$ ) titrated with ICG (0–3.0 equiv) in  $\text{H}_2\text{O}$ . (b) UV/vis spectra of ICG (10  $\mu\text{M}$ ) titrated with  $1\bullet 8\text{Cl}^-$  (0–2.0 equiv) in  $\text{H}_2\text{O}$ .

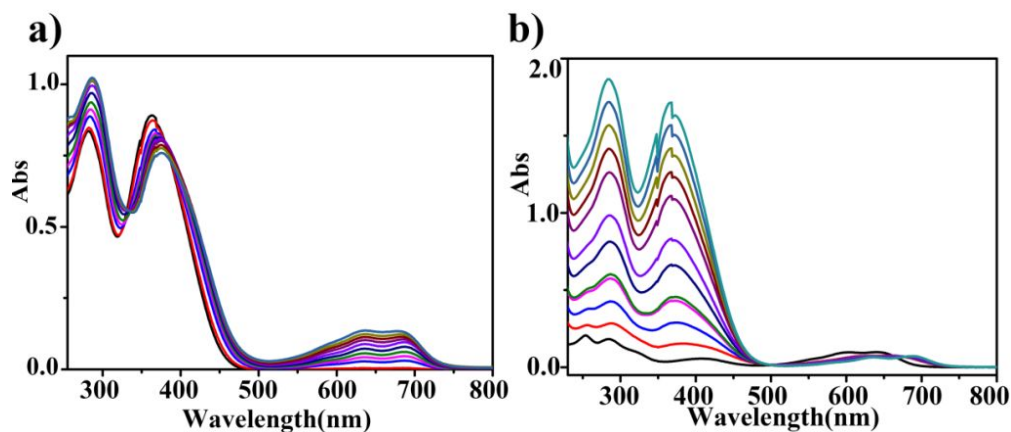

**Figure S27.** (a) UV/vis spectra of  $1\bullet 8\text{Cl}^-$  (10  $\mu\text{M}$ ) titrated with AG (0–3.0 equiv) in  $\text{H}_2\text{O}$ . (b) UV/vis spectra of AG (10  $\mu\text{M}$ ) titrated with  $1\bullet 8\text{Cl}^-$  (0–2.0 equiv) in  $\text{H}_2\text{O}$ .

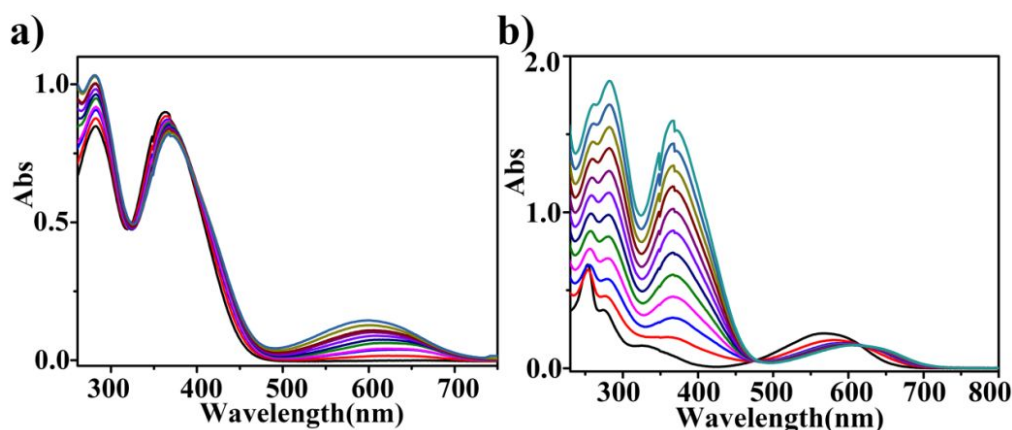

**Figure S28.** (a) UV/vis spectra of **1•8Cl<sup>-</sup>** (10  $\mu$ M) titrated with **AV** (0–3.0 equiv) in H<sub>2</sub>O. (b) UV/vis spectra of **AV** (10  $\mu$ M) titrated with **1•8Cl<sup>-</sup>** (0–2.0 equiv) in H<sub>2</sub>O.

The antenna effect under certain concentrations of donor and acceptor equals the ratio of the emission intensity of the acceptor upon excitation of the donor, ( $\lambda_{ex} = 410$  nm) direct excitation of the acceptor.

$$\text{Antenna effect} = \frac{I_{A+D}^{(608/678/711) \text{ nm}}(\lambda_{ex} = 410 \text{ nm}) - I_D^{(608/678/711) \text{ nm}}(\lambda_{ex} = 410 \text{ nm})}{I_{A+D}^{(608/678/711) \text{ nm}}(\lambda_{ex} = 525/570/620 \text{ nm})}$$

The antenna effect of **1•8PF<sub>6</sub><sup>-</sup>** + 2.0 eq NiR ( $[I] = 10$   $\mu$ M) was calculated as 81.12 in MeCN. The antenna effect of **1•8Cl<sup>-</sup>** + 2.0 eq R700 ( $[I] = 10$   $\mu$ M) was calculated as 1.30 in H<sub>2</sub>O. The antenna effect of **1•8Cl<sup>-</sup>** + 2.0 eq R800 ( $[I] = 10$   $\mu$ M) was calculated as 1.27 in H<sub>2</sub>O. When compared with other self-assembled systems, this antenna effect is low.

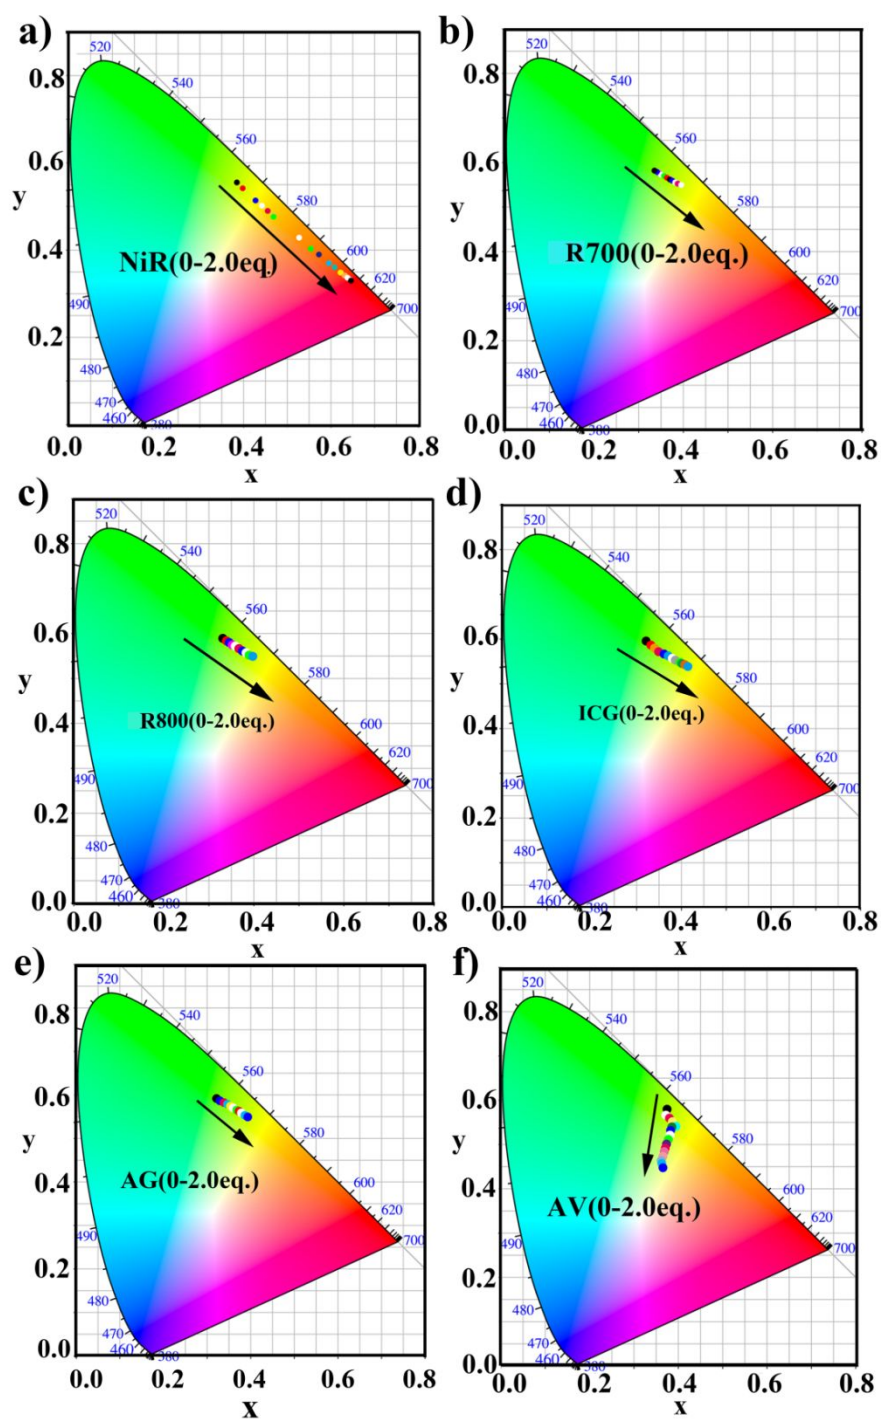

**Figure S29.** the 1931 CIE chromaticity coordinate changes of **1** (10  $\mu\text{M}$ ) titrated with dyes (0–2.0 equiv): (a) **NiR**, (b) **R700**, (c) **R800**, (d) **ICG**, (e) **AG**, (f) **AV**.

**Table S2.** The redox potentials (vs Ag/AgCl in CH<sub>3</sub>CN), HOMO and LUMO Energies of the cages and host-guest complexes.<sup>a</sup>

| Compound                             | $\Delta E(\text{eV})^b$ | $\lambda_{\text{max(onset)}}(\text{nm})$ | $E^1_{\text{Red}}/E^2_{\text{Red}}(\text{eV})$ | LUMO/HOMO(eV) <sup>c,d</sup> |
|--------------------------------------|-------------------------|------------------------------------------|------------------------------------------------|------------------------------|
| <b>1•8PF<sub>6</sub><sup>-</sup></b> | 2.71                    | 456.00                                   | -0.70/-1.09                                    | -3.68/-6.39                  |
| <b>2•4PF<sub>6</sub><sup>-</sup></b> | 2.71                    | 456.00                                   | -0.69/-1.37                                    | -3.69/-6.39                  |
| <b>1□NiR</b>                         | 2.66                    | 466.71                                   | -0.48/-0.90                                    | -3.90/-6.56                  |
| <b>1□R700</b>                        | 2.65                    | 467.97                                   | -0.65/-0.90                                    | -3.73/-6.38                  |
| <b>1□R800</b>                        | 2.64                    | 469.05                                   | -0.59/-0.79                                    | -3.79/-6.43                  |
| <b>1□ICG</b>                         | 2.64                    | 468.94                                   | -0.73/-0.96                                    | -3.65/-6.29                  |
| <b>1□AG</b>                          | 2.59                    | 479.12                                   | -0.75/-1.14                                    | -3.63/-6.22                  |
| <b>1□AV</b>                          | 2.65                    | 468.62                                   | -0.68/-0.90                                    | -3.70/-6.35                  |
| <b>NiR</b>                           | 2.07                    | 600.00                                   | -1.16                                          | -3.22/-5.29                  |
| <b>R700</b>                          | 1.82                    | 680.70                                   | -0.60/-1.26                                    | -3.78/-5.60                  |
| <b>R800</b>                          | 1.68                    | 737.03                                   | -0.60/-1.00                                    | -3.78/-5.46                  |
| <b>ICG</b>                           | 1.34                    | 923.25                                   | -0.93                                          | -3.45/-4.79                  |
| <b>AG</b>                            | 1.76                    | 705.39                                   | -0.97/-1.29                                    | -3.41/-5.17                  |
| <b>AV</b>                            | 1.87                    | 664.13                                   | -0.35/0.97                                     | -4.03/-5.90                  |

<sup>a</sup>Determined by cyclic voltammetry with the ferrocene/ferricenium couple (Fc/Fc<sup>+</sup>) as external or internal standard. A glassy carbon working electrode, an Ag/AgCl reference electrode and a platinum counter electrode were used to characterize 1.0 mM DMSO solutions of the hexafluorophosphate salts of the analytes at 298 K, with 0.1 M TBAPF<sub>6</sub> serving as the supporting electrolyte at a scan rate of 50 mVs<sup>-1</sup>. Calculation of HOMO and LUMO energies: <sup>b</sup> $\Delta E_{\text{HOMO/LUMO}} = [1240/(\lambda_{\text{max(onset)}} \text{ (nm)})]\text{eV}$ ; <sup>c</sup> $E_{\text{LUMO}} = -[4.8-0.42+E^1_{\text{Red}}]\text{eV}$  for  $E^1_{\text{Red}}$  vs Ag/AgCl; <sup>d</sup> $E_{\text{HOMO}} = E_{\text{LUMO}}-\Delta E_{\text{HOMO/LUMO}} \text{ eV}$ .



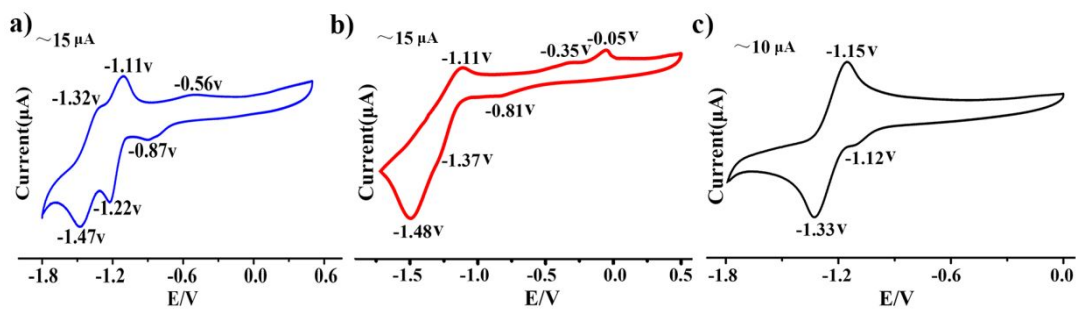

**Figure S30.** Cyclic voltammetry of (a)  $1\bullet 8\text{PF}_6^-$ , (b)  $2\bullet 4\text{PF}_6^-$ , (c)  $\text{NiR}$ .

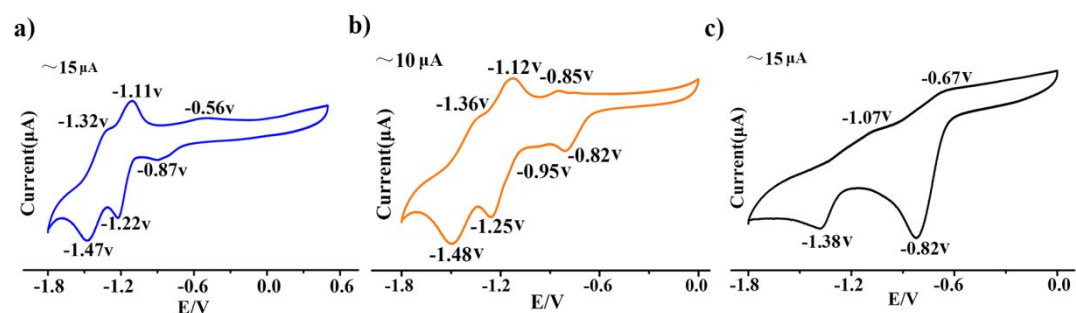

**Figure S31.** Cyclic voltammetry of (a)  $1\bullet 8\text{PF}_6^-$ , (b)  $1\bullet 8\text{Cl}^- \square \text{R700}$ , (c)  $\text{R700}$ .

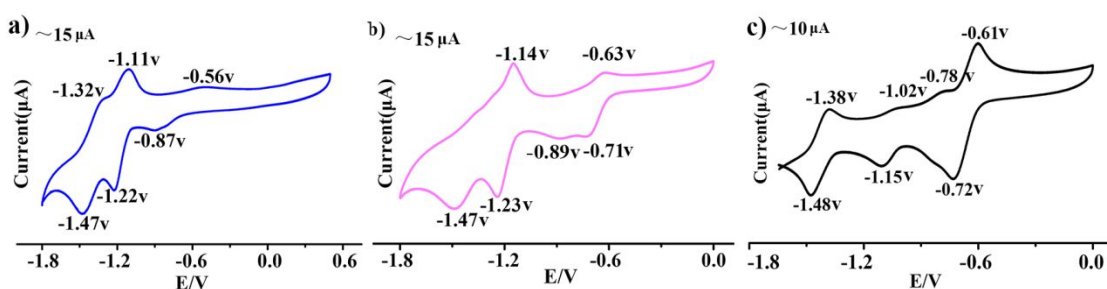

**Figure S32.** Cyclic voltammetry of (a)  $1\bullet 8\text{PF}_6^-$ , (b)  $1\bullet 8\text{Cl}^- \square \text{R800}$ , (c)  $\text{R800}$ .

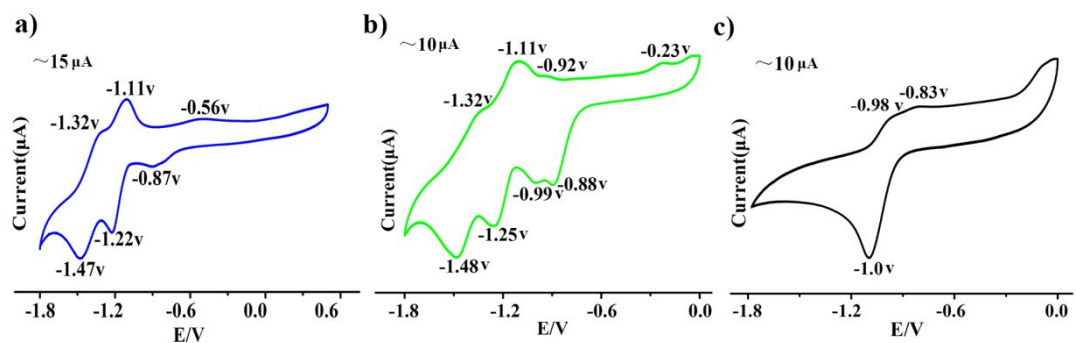

**Figure S33.** Cyclic voltammetry of (a)  $1\bullet 8\text{PF}_6^-$ , (b)  $1\bullet 8\text{Cl}^- \square \text{ICG}$ , (c)  $\text{ICG}$ .



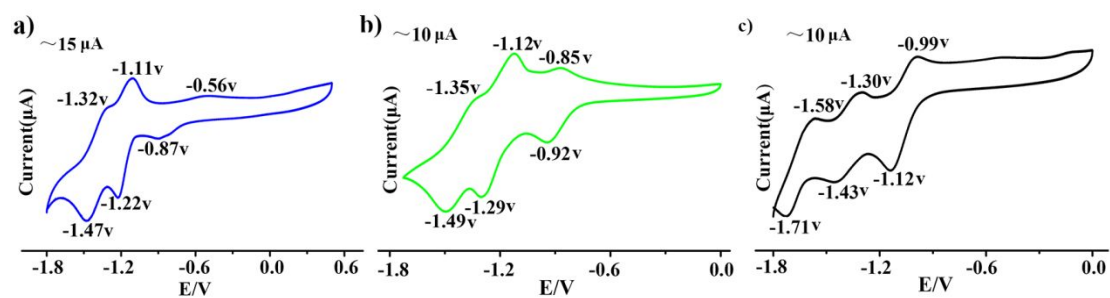

**Figure S34.** Cyclic voltammetry of (a) 1·8PF<sub>6</sub><sup>-</sup>, (b) 1·8Cl<sup>-</sup>□AG, (c) AG.

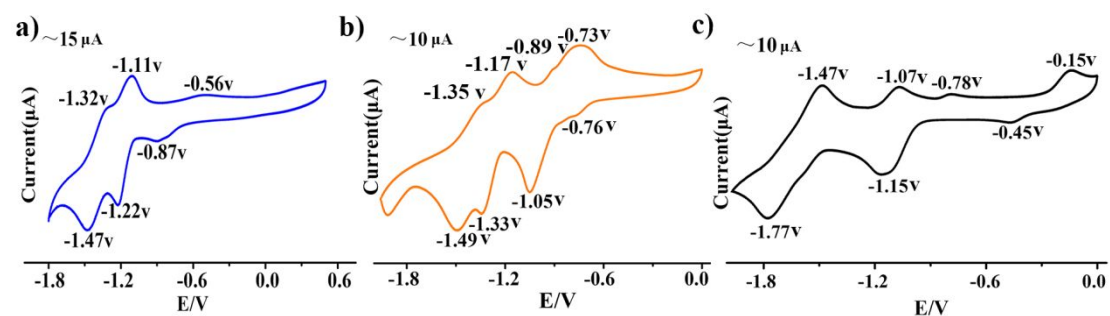

**Figure S35.** Cyclic voltammetry of (a) 1·8PF<sub>6</sub><sup>-</sup>, (b) 1·8Cl<sup>-</sup>□AV, (c) AV.

### **Femtosecond Transient Absorption (fsTA) Experiments.**

The fsTA measurements were performed based on a femtosecond Ti:Sapphire regenerative amplified Ti:sapphire laser system (Spectra Physics, Spitfire-Pro) and an automated data acquisition system (Ultrafast Systems, Helios model). The excitation pulse (1 kHz, 240-2,600 nm, pulse width, 120 fs) was generated by an optical parametric amplifier (TOPAS-C, Spectra-Physics) pumped by a regeneratively amplified femtosecond Ti:sapphire laser system (800 nm, 1 kHz, pulse energy 4 mJ, pulse width, 120 fs, Spitfire Pro-F1KXP, Spectra-Physics), which was seeded by a femtosecond Ti-sapphire oscillator (80 MHz, pulse width, 70 fs, 710-920 nm, Maitai XF-1, Spectra-Physics). The probe pulse was obtained by using approximately 5% of the amplified 800 nm output from the Spitfire to generate a white-light continuum (450-800 nm) in a sapphire plate. The maximum extent of the temporal delay was 3300 ps. The instrument response function was determined to be 150 fs. At each temporal delay, data were averaged for 2 s and collected by the acquisition system. The probe beam was split into two before passing through the sample. One probe beam traveled through the sample; the other was sent directly to the reference spectrometer that monitored the fluctuations in the probe beam intensity. Fiber optics was coupled to a multichannel spectrometer with a CMOS sensor that had a 1.5 nm intrinsic resolution. The sample suspension was excited by a 355 nm pump beam. The data were stored as three-dimensional (3D) wavelength-time-absorbance matrices that were exported for use with the fitting software.

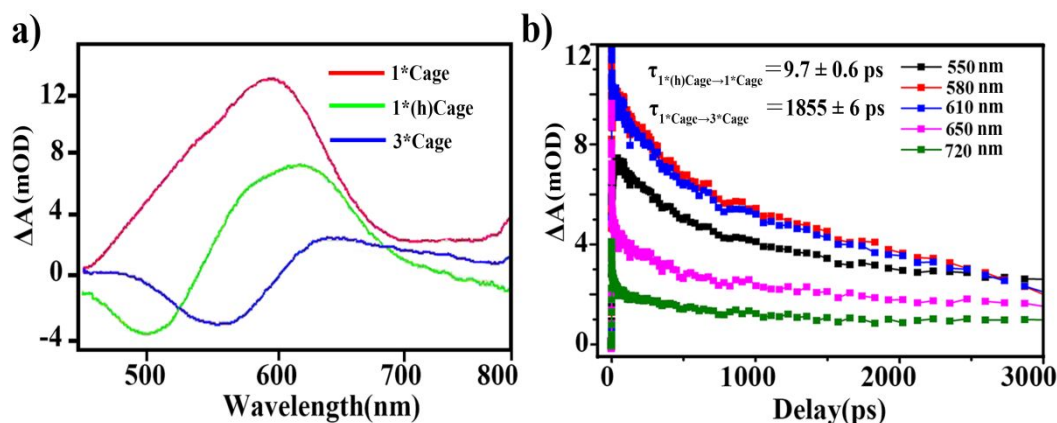

**Figure S36.** (a) Species-associated spectra obtained from deconvolution of the dataset with the kinetic fit solution.  $\text{H}_2\text{O}$ ,  $\lambda_{\text{ex}} = 355 \text{ nm}$ ,  $1.1 \mu\text{J pulse}^{-1}$ . (b) Global fits to selected wavelengths in  $1^*\text{8Cl}^-$  to the kinetic model described in the text and below.

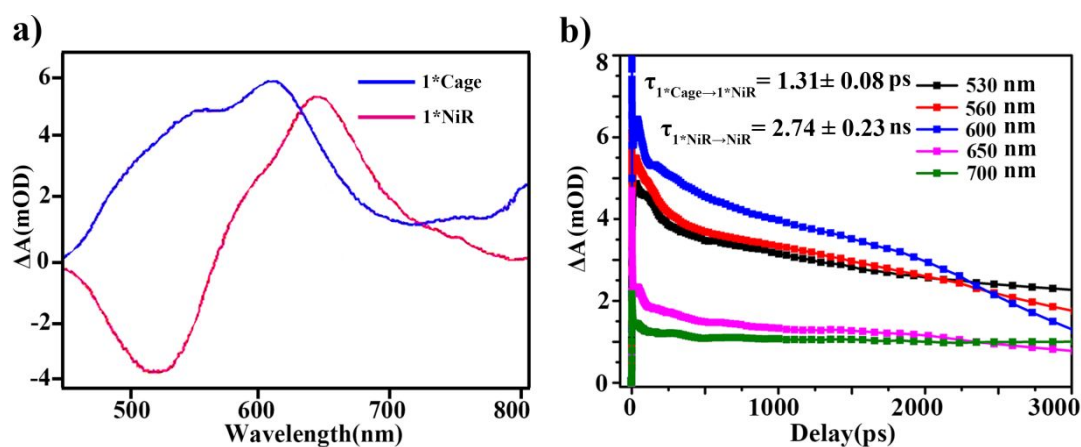

**Figure S37.** (a) Species-associated spectra obtained from deconvolution of the dataset with the kinetic fit solution.  $\text{MeCN}$ ,  $\lambda_{\text{ex}} = 355 \text{ nm}$ ,  $1.1 \mu\text{J pulse}^{-1}$ . (b) Global fits to selected wavelengths in  $1^*\text{8PF}_6^- \square \text{NiR}$  to the kinetic model described in the text and below.

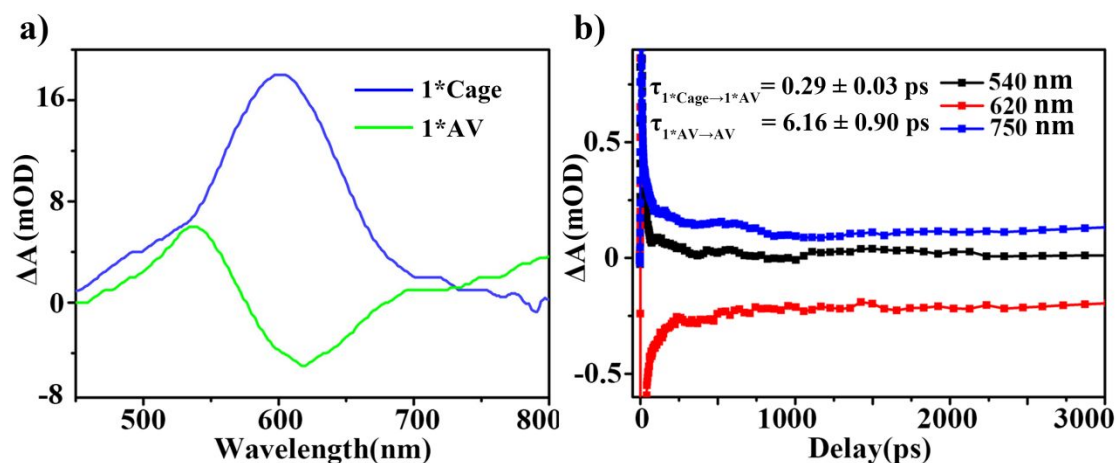

**Figure S38.** (a) Species-associated spectra obtained from deconvolution of the dataset with the kinetic fit solution.  $\text{H}_2\text{O}$ ,  $\lambda_{\text{ex}} = 355 \text{ nm}$ ,  $1.1 \mu\text{J pulse}^{-1}$ . (b) Global fits to selected wavelengths in  $1 \cdot 8\text{Cl}^- \rightarrow \text{AV}$  to the kinetic model described in the text and below.

## Reference

1. H. Duan, Y. Li, Q. Li, P. Wang, X. Liu, L. Cheng, Y. Yu and L. Cao, Fluorescence and Host–Guest Recognition of a Tetraphenylethene-Based Octacationic Cage. *Angew. Chem. Int. Ed.*, **2020**, 59, 10101.
2. Z. Xu, S. Peng, Y. Wang, J. Zhang, A. Lazar, D. Guo, Broad-Spectrum Tunable Photoluminescent Nanomaterials Constructed from A Modular Light-Harvesting Platform Based on Macrocyclic Amphiphiles. *Adv. Mater.* **2016**, 28, 7666.
